# Supplementary material for: DNN-m6A: A Cross-Species Method for Identifying RNA N6-methyladenosine Sites Based on Deep Neural Network with Multi-Information Fusion
Source: PubMed Central journal article supplement (PMC7997228; doi:10.3390/genes12030354), 2021-02-28
Supplement: genes-12-00354-s001.pdf [file genes-12-00354-s001.pdf]

## Supplementary Materials:

# DNN-m6A: A Cross-Species Method for Identifying RNA N6-methyladenosine Sites Based on Deep Neural Network with Multi-Information Fusion

Lu Zhang<sup>1</sup>, Xinyi Qin<sup>1</sup>, Min Liu<sup>1</sup>, Ziwei Xu<sup>2</sup>, and Guangzhong Liu<sup>1,\*</sup>

<sup>1</sup> College of Information Engineering, Shanghai Maritime University, Shanghai 201306, China

<sup>2</sup> Polytech Nantes, Bâtiment Ireste, Nantes 44300, France

\* Correspondence: gzhliu@shmtu.edu.cn

### Table of Contents

### Supplementary Tables

**Table S1.** ACC values corresponding to different  $\lambda$  and  $w$  in PseDNC.

**Table S2.** ACC values corresponding to different  $K_{max}$  in KSNPEs.

**Table S3.** ACC values corresponding to different feature extraction methods (All represents the initial feature space corresponding to the fusion of eight features).

**Table S4.** Performance of different feature selection methods.

**Table S5.** Performance comparison with iRNA-m6A on the training datasets.

**Table S6.** Performance comparison with iRNA-m6A on the independent datasets.

**Table S7.** Comparison of prediction results of different methods on S51.

## 1. Supplementary Tables

**Table S1.**

ACC values corresponding to different  $\lambda$  and  $w$  in PseDNC.

| $\lambda$    | $w$     | H_B           | H_K           | H_L           | M_B           | M_H           | M_K           | M_L           | M_T           | R_B           | R_K           | R_L           |
|--------------|---------|---------------|---------------|---------------|---------------|---------------|---------------|---------------|---------------|---------------|---------------|---------------|
| $\lambda=10$ | $w=0.1$ | 0.6691        | <b>0.7671</b> | 0.7614        | 0.7662        | 0.6954        | 0.7860        | 0.6752        | 0.7173        | 0.7277        | 0.8031        | 0.7934        |
|              | $w=0.3$ | 0.6662        | 0.7654        | 0.7610        | 0.7660        | 0.6981        | 0.7838        | 0.6754        | 0.7163        | 0.7238        | 0.8018        | 0.7926        |
|              | $w=0.5$ | 0.6673        | 0.7658        | 0.7618        | <b>0.7677</b> | 0.6963        | 0.7822        | 0.6755        | 0.7160        | 0.7236        | 0.8013        | 0.7929        |
|              | $w=0.7$ | 0.6661        | 0.7656        | 0.7606        | 0.7665        | 0.6979        | 0.7831        | 0.6748        | 0.7173        | 0.7226        | 0.8013        | 0.7929        |
|              | $w=0.9$ | 0.6654        | 0.7653        | 0.7621        | 0.7672        | 0.6972        | 0.7835        | 0.6742        | 0.7156        | 0.7236        | 0.8018        | 0.7920        |
| $\lambda=20$ | $w=0.1$ | 0.6734        | 0.7645        | 0.7587        | 0.7647        | 0.6995        | 0.7861        | 0.6792        | 0.7171        | 0.7311        | 0.8045        | 0.7926        |
|              | $w=0.3$ | 0.6723        | 0.7662        | 0.7593        | 0.7647        | 0.6999        | 0.7854        | 0.6795        | 0.7179        | 0.7294        | 0.8040        | 0.7937        |
|              | $w=0.5$ | 0.6738        | 0.7657        | 0.7565        | 0.7640        | 0.6988        | 0.7859        | 0.6799        | 0.7178        | 0.7285        | 0.8048        | 0.7937        |
|              | $w=0.7$ | 0.6740        | 0.7645        | 0.7568        | 0.7655        | 0.6979        | 0.7867        | 0.6800        | 0.7175        | 0.7296        | 0.8050        | <b>0.7943</b> |
|              | $w=0.9$ | 0.6719        | 0.7644        | 0.7565        | 0.7646        | 0.6976        | 0.7861        | <b>0.6803</b> | <b>0.7187</b> | 0.7292        | 0.8059        | 0.7926        |
| $\lambda=30$ | $w=0.1$ | <b>0.6756</b> | 0.7663        | 0.7686        | 0.7650        | 0.7097        | 0.7869        | 0.6797        | 0.7177        | 0.7362        | 0.8067        | 0.7917        |
|              | $w=0.3$ | 0.6737        | 0.7651        | <b>0.7713</b> | 0.7654        | 0.7094        | 0.7884        | 0.6788        | 0.7179        | 0.7366        | <b>0.8079</b> | 0.7931        |
|              | $w=0.5$ | 0.6737        | 0.7655        | 0.7694        | 0.7642        | 0.7088        | <b>0.7899</b> | 0.6800        | 0.7181        | <b>0.7377</b> | 0.8066        | 0.7926        |
|              | $w=0.7$ | 0.6744        | 0.7633        | 0.7703        | 0.7650        | <b>0.7097</b> | 0.7891        | 0.6770        | 0.7179        | 0.7351        | 0.8059        | 0.7926        |
|              | $w=0.9$ | 0.6738        | 0.7640        | 0.7701        | 0.7642        | 0.7092        | 0.7890        | 0.6771        | 0.7181        | 0.7345        | 0.8060        | 0.7906        |

**Table S2.**

ACC values corresponding to different  $K_{max}$  in KSNPEs.

| Parameter   | H_B           | H_K           | H_L           | M_B           | M_H           | M_K           | M_L           | M_T           | R_B           | R_K           | R_L           |
|-------------|---------------|---------------|---------------|---------------|---------------|---------------|---------------|---------------|---------------|---------------|---------------|
| $K_{max}=1$ | 0.6856        | 0.7691        | 0.7640        | 0.7667        | 0.7079        | 0.7926        | 0.6909        | 0.7260        | 0.7321        | 0.8098        | 0.7897        |
| $K_{max}=2$ | 0.6940        | 0.7727        | 0.7732        | 0.7705        | 0.7142        | 0.7951        | 0.6972        | <b>0.7389</b> | 0.7445        | 0.8133        | 0.7965        |
| $K_{max}=3$ | <b>0.7014</b> | <b>0.7754</b> | 0.7724        | 0.7713        | 0.7163        | 0.7970        | <b>0.7023</b> | 0.7368        | 0.7436        | <b>0.8156</b> | <b>0.8076</b> |
| $K_{max}=4$ | 0.6995        | 0.7737        | 0.7762        | 0.7703        | <b>0.7263</b> | 0.7964        | 0.7006        | 0.7362        | 0.7426        | 0.8131        | 0.7997        |
| $K_{max}=5$ | 0.6958        | 0.7750        | <b>0.7794</b> | <b>0.7714</b> | 0.7210        | <b>0.7986</b> | 0.7006        | 0.7333        | <b>0.7474</b> | 0.8107        | 0.8028        |

**Table S3.**

ACC values corresponding to different feature extraction methods (All represents the initial feature space corresponding to the fusion of eight features).

| Methods | H_B           | H_K           | H_L           | M_B           | M_H           | M_K           | M_L           | M_T           | R_B           | R_K           | R_L           |
|---------|---------------|---------------|---------------|---------------|---------------|---------------|---------------|---------------|---------------|---------------|---------------|
| BE      | 0.6979        | 0.7728        | 0.7756        | 0.7626        | 0.7001        | 0.7864        | 0.6793        | 0.7217        | 0.7279        | 0.7986        | 0.7775        |
| KSNPFs  | 0.7014        | 0.7754        | 0.7794        | 0.7714        | <b>0.7263</b> | <b>0.7986</b> | 0.7023        | 0.7389        | 0.7474        | 0.8156        | <b>0.8076</b> |
| ENAC    | 0.7027        | 0.7789        | 0.7728        | 0.7665        | 0.7065        | 0.7909        | 0.6833        | 0.7207        | 0.7362        | 0.8066        | 0.7994        |
| NCP     | 0.6974        | 0.7766        | 0.7840        | 0.7662        | 0.7006        | 0.7914        | 0.6857        | 0.7217        | 0.7336        | 0.8034        | 0.7875        |
| PseDNC  | 0.6756        | 0.7671        | 0.7713        | 0.7677        | 0.7097        | 0.7899        | 0.6803        | 0.7187        | 0.7377        | 0.8079        | 0.7943        |
| TNC     | 0.6996        | 0.7759        | 0.7864        | 0.7743        | 0.7204        | 0.7972        | <b>0.7099</b> | <b>0.7394</b> | 0.7457        | <b>0.8159</b> | 0.8053        |
| PSNP    | 0.6947        | 0.7740        | 0.7872        | 0.7683        | 0.7040        | 0.7881        | 0.6795        | 0.7145        | 0.7370        | 0.8016        | 0.7948        |
| PSDP    | 0.7064        | 0.7773        | <b>0.7893</b> | 0.7734        | 0.7233        | 0.7905        | 0.6986        | 0.7273        | <b>0.7538</b> | 0.8101        | 0.8042        |
| All     | <b>0.7115</b> | <b>0.7828</b> | 0.7743        | <b>0.7755</b> | 0.7129        | 0.7905        | 0.7008        | 0.7387        | 0.7483        | 0.8053        | 0.7860        |

**Table S4.**

Performance of different feature selection methods.

| Species | Tissues | Initial | Methods | Optimal | ACC           | Sn     | Sp     | MCC    | AUC    |
|---------|---------|---------|---------|---------|---------------|--------|--------|--------|--------|
| Human   | Brain   | 690     | LLE     | 82      | 0.6704        | 0.7585 | 0.5822 | 0.3475 | 0.7396 |
|         |         |         | mRMR    |         | 0.7152        | 0.8211 | 0.6093 | 0.4409 | 0.7899 |
|         |         |         | SE      |         | 0.7117        | 0.8089 | 0.6145 | 0.4322 | 0.7912 |
|         |         |         | SVD     |         | 0.7127        | 0.8085 | 0.6169 | 0.4338 | 0.7907 |
|         |         |         | EN      |         | <b>0.7344</b> | 0.8165 | 0.6523 | 0.4764 | 0.8131 |
|         | Kidney  | 670     | LLE     | 91      | 0.7570        | 0.8201 | 0.6939 | 0.5187 | 0.8374 |
|         |         |         | mRMR    |         | 0.7965        | 0.8664 | 0.7265 | 0.5991 | 0.8764 |
|         |         |         | SE      |         | 0.7802        | 0.8415 | 0.7188 | 0.5668 | 0.8666 |
|         |         |         | SVD     |         | 0.7819        | 0.8380 | 0.7258 | 0.5687 | 0.8684 |
|         |         |         | EN      |         | <b>0.7984</b> | 0.8640 | 0.7328 | 0.6023 | 0.8826 |
|         | Liver   | 722     | LLE     | 103     | 0.7709        | 0.7939 | 0.7479 | 0.5441 | 0.8435 |
|         |         |         | mRMR    |         | 0.8022        | 0.8466 | 0.7578 | 0.6078 | 0.8816 |
|         |         |         | SE      |         | 0.7918        | 0.8269 | 0.7566 | 0.5860 | 0.8692 |
|         |         |         | SVD     |         | 0.7887        | 0.8155 | 0.7619 | 0.5795 | 0.8688 |
|         |         |         | EN      |         | <b>0.8077</b> | 0.8466 | 0.7688 | 0.6188 | 0.8859 |
| Mouse   | Brain   | 702     | LLE     | 114     | 0.7460        | 0.7598 | 0.7323 | 0.4943 | 0.8240 |
|         |         |         | mRMR    |         | 0.7845        | 0.8116 | 0.7574 | 0.5708 | 0.8690 |
|         |         |         | SE      |         | 0.7750        | 0.7858 | 0.7641 | 0.5521 | 0.8590 |
|         |         |         | SVD     |         | 0.7716        | 0.7855 | 0.7576 | 0.5446 | 0.8587 |
|         |         |         | EN      |         | <b>0.7890</b> | 0.8160 | 0.7621 | 0.5807 | 0.8758 |
|         | Heart   | 706     | LLE     | 117     | 0.6956        | 0.7619 | 0.6293 | 0.3956 | 0.7592 |
|         |         |         | mRMR    |         | 0.7308        | 0.7824 | 0.6792 | 0.4657 | 0.8129 |
|         |         |         | SE      |         | 0.7133        | 0.7397 | 0.6870 | 0.4283 | 0.7989 |
|         |         |         | SVD     |         | 0.7215        | 0.7624 | 0.6806 | 0.4452 | 0.8035 |
|         |         |         | EN      |         | <b>0.7565</b> | 0.7865 | 0.7265 | 0.5144 | 0.8375 |
|         | Kidney  | 722     | LLE     | 88      | 0.7785        | 0.8083 | 0.7488 | 0.5591 | 0.8561 |
|         |         |         | mRMR    |         | 0.8036        | 0.8513 | 0.7559 | 0.6110 | 0.8844 |
|         |         |         | SE      |         | 0.7964        | 0.8457 | 0.7470 | 0.5967 | 0.8790 |

|     |        |     |      |     |               |        |        |        |        |
|-----|--------|-----|------|-----|---------------|--------|--------|--------|--------|
|     |        |     | SVD  |     | 0.7985        | 0.8462 | 0.7508 | 0.6007 | 0.8799 |
|     |        |     | EN   |     | <b>0.8151</b> | 0.8530 | 0.7771 | 0.6331 | 0.8944 |
|     | Liver  | 680 | LLE  | 86  | 0.6579        | 0.8004 | 0.5154 | 0.3312 | 0.7225 |
|     |        |     | mRMR |     | 0.7054        | 0.8309 | 0.5800 | 0.4261 | 0.7820 |
|     |        |     | SE   |     | 0.6942        | 0.8270 | 0.5613 | 0.4034 | 0.7746 |
|     |        |     | SVD  |     | 0.6950        | 0.8123 | 0.5778 | 0.4023 | 0.7764 |
|     |        |     | EN   |     | <b>0.7303</b> | 0.8210 | 0.6397 | 0.4697 | 0.8114 |
|     | Testis | 664 | LLE  | 151 | 0.6974        | 0.7130 | 0.6818 | 0.3971 | 0.7689 |
|     |        |     | mRMR |     | 0.7459        | 0.7604 | 0.7315 | 0.4932 | 0.8315 |
|     |        |     | SE   |     | 0.7368        | 0.7559 | 0.7177 | 0.4740 | 0.8168 |
|     |        |     | SVD  |     | 0.7455        | 0.7718 | 0.7191 | 0.4927 | 0.8244 |
|     |        |     | EN   |     | <b>0.7616</b> | 0.8007 | 0.7225 | 0.5259 | 0.8429 |
| Rat | Brain  | 722 | LLE  | 88  | 0.7158        | 0.7666 | 0.6650 | 0.4351 | 0.7981 |
|     |        |     | mRMR |     | 0.7689        | 0.8099 | 0.7279 | 0.5400 | 0.8516 |
|     |        |     | SE   |     | 0.7479        | 0.7874 | 0.7083 | 0.4980 | 0.8362 |
|     |        |     | SVD  |     | 0.7579        | 0.7963 | 0.7194 | 0.5180 | 0.8412 |
|     |        |     | EN   |     | <b>0.7819</b> | 0.8180 | 0.7457 | 0.5657 | 0.8672 |
|     | Kidney | 690 | LLE  | 88  | 0.7859        | 0.8340 | 0.7378 | 0.5749 | 0.8649 |
|     |        |     | mRMR |     | 0.8236        | 0.8430 | 0.8042 | 0.6485 | 0.9012 |
|     |        |     | SE   |     | 0.8121        | 0.8439 | 0.7804 | 0.6258 | 0.8937 |
|     |        |     | SVD  |     | 0.8143        | 0.8331 | 0.7955 | 0.6298 | 0.8945 |
|     |        |     | EN   |     | <b>0.8321</b> | 0.8488 | 0.8153 | 0.6658 | 0.9087 |
|     | Liver  | 680 | LLE  | 87  | 0.7835        | 0.8411 | 0.7259 | 0.5713 | 0.8602 |
|     |        |     | mRMR |     | 0.8156        | 0.8400 | 0.7911 | 0.6330 | 0.8902 |
|     |        |     | SE   |     | 0.8062        | 0.8400 | 0.7724 | 0.6143 | 0.8787 |
|     |        |     | SVD  |     | 0.7965        | 0.8269 | 0.7662 | 0.5949 | 0.8782 |
|     |        |     | EN   |     | <b>0.8229</b> | 0.8428 | 0.8031 | 0.6474 | 0.8962 |

Note: “Initial” represents the dimension of initial feature vector sets without doing feature reduction, “Optimal”

denotes the dimension of the optimal feature subsets.

**Table S5.**

Performance comparison with iRNA-m6A on the training datasets.

| Species | Tissues | Methods  | ACC           | Sn     | Sp     | MCC  | AUC    |
|---------|---------|----------|---------------|--------|--------|------|--------|
| Human   | Brain   | DNN-m6A  | <b>0.7378</b> | 0.7848 | 0.6908 | 0.48 | 0.8165 |
|         |         | iRNA-m6A | 0.7126        | 0.7479 | 0.6619 | 0.41 | 0.7756 |
|         | Kidney  | DNN-m6A  | <b>0.8048</b> | 0.8356 | 0.7739 | 0.61 | 0.8841 |
|         |         | iRNA-m6A | 0.7899        | 0.8085 | 0.7634 | 0.57 | 0.8634 |
|         | Liver   | DNN-m6A  | <b>0.8130</b> | 0.8219 | 0.8041 | 0.63 | 0.8905 |
|         |         | iRNA-m6A | 0.8013        | 0.8132 | 0.7813 | 0.59 | 0.8738 |
| Mouse   | Brain   | DNN-m6A  | <b>0.7936</b> | 0.8176 | 0.7697 | 0.59 | 0.8778 |
|         |         | iRNA-m6A | 0.7875        | 0.7932 | 0.7690 | 0.58 | 0.8701 |
|         | Heart   | DNN-m6A  | <b>0.7617</b> | 0.7751 | 0.7483 | 0.52 | 0.8439 |
|         |         | iRNA-m6A | 0.7276        | 0.7524 | 0.6897 | 0.44 | 0.7948 |
|         | Kidney  | DNN-m6A  | <b>0.8196</b> | 0.8320 | 0.8072 | 0.64 | 0.8953 |
|         |         | iRNA-m6A | 0.7998        | 0.8260 | 0.7731 | 0.60 | 0.8726 |

|     |        |          |               |        |        |      |        |
|-----|--------|----------|---------------|--------|--------|------|--------|
| Rat | Liver  | DNN-m6A  | <b>0.7358</b> | 0.7757 | 0.6959 | 0.47 | 0.8139 |
|     |        | iRNA-m6A | 0.7059        | 0.7493 | 0.6559 | 0.41 | 0.7743 |
|     | Testis | DNN-m6A  | <b>0.7662</b> | 0.8099 | 0.7225 | 0.53 | 0.8493 |
|     |        | iRNA-m6A | 0.7440        | 0.7814 | 0.7002 | 0.48 | 0.8156 |
|     | Brain  | DNN-m6A  | <b>0.7827</b> | 0.7908 | 0.7746 | 0.57 | 0.8678 |
|     |        | iRNA-m6A | 0.7596        | 0.7700 | 0.7347 | 0.50 | 0.8282 |
|     | Kidney | DNN-m6A  | <b>0.8338</b> | 0.8427 | 0.8249 | 0.67 | 0.9104 |
|     |        | iRNA-m6A | 0.8178        | 0.8246 | 0.8005 | 0.63 | 0.8877 |
|     | Liver  | DNN-m6A  | <b>0.8263</b> | 0.8417 | 0.8110 | 0.65 | 0.8991 |
|     |        | iRNA-m6A | 0.8090        | 0.8309 | 0.7633 | 0.60 | 0.8766 |

**Table S6.**

Performance comparison with iRNA-m6A on the independent datasets.

| Species | Tissues | Methods  | ACC           | Sn            | Sp     | MCC    | AUC    |        |
|---------|---------|----------|---------------|---------------|--------|--------|--------|--------|
| Human   | Brain   | DNN-m6A  | <b>0.7327</b> | 0.7502        | 0.7152 | 0.47   | 0.8147 |        |
|         |         | iRNA-m6A | 0.711         | 0.6950        | 0.7298 | 0.42   | 0.7845 |        |
|         | Kidney  | DNN-m6A  | <b>0.7989</b> | 0.8316        | 0.7662 | 0.60   | 0.8780 |        |
|         |         | iRNA-m6A | 0.7776        | 0.7713        | 0.7842 | 0.56   | 0.8565 |        |
|         | Liver   | DNN-m6A  | <b>0.8096</b> | 0.8178        | 0.8014 | 0.62   | 0.8854 |        |
|         |         | iRNA-m6A | 0.7901        | 0.7819        | 0.7987 | 0.58   | 0.8681 |        |
| Mouse   | Brain   | DNN-m6A  | <b>0.7859</b> | 0.7507        | 0.8211 | 0.57   | 0.8760 |        |
|         |         | iRNA-m6A | 0.7826        | 0.7720        | 0.7941 | 0.57   | 0.8613 |        |
|         | Heart   | DNN-m6A  | <b>0.7511</b> | 0.7727        | 0.7295 | 0.50   | 0.8338 |        |
|         |         | iRNA-m6A | 0.713         | 0.7052        | 0.7213 | 0.43   | 0.7878 |        |
|         | Kidney  | DNN-m6A  | <b>0.8087</b> | 0.8117        | 0.8057 | 0.62   | 0.8888 |        |
|         |         | iRNA-m6A | 0.7931        | 0.7837        | 0.8032 | 0.59   | 0.8697 |        |
|         | Liver   | DNN-m6A  | <b>0.7295</b> | 0.7639        | 0.6951 | 0.46   | 0.8079 |        |
|         |         | iRNA-m6A | 0.6879        | 0.6782        | 0.6986 | 0.38   | 0.762  |        |
|         | Testis  | DNN-m6A  | <b>0.7712</b> | 0.8009        | 0.7416 | 0.54   | 0.8535 |        |
|         |         | iRNA-m6A | 0.7354        | 0.7219        | 0.7508 | 0.47   | 0.8182 |        |
|         | Rat     | Brain    | DNN-m6A       | <b>0.7799</b> | 0.7767 | 0.7831 | 0.56   | 0.8624 |
|         |         |          | iRNA-m6A      | 0.7514        | 0.7393 | 0.7648 | 0.50   | 0.8265 |
| Kidney  |         | DNN-m6A  | <b>0.8304</b> | 0.8534        | 0.8074 | 0.66   | 0.9109 |        |
|         |         | iRNA-m6A | 0.8142        | 0.8018        | 0.8277 | 0.63   | 0.8968 |        |
| Liver   |         | DNN-m6A  | <b>0.8164</b> | 0.8280        | 0.8048 | 0.63   | 0.8956 |        |
|         |         | iRNA-m6A | 0.7985        | 0.7774        | 0.8231 | 0.60   | 0.8761 |        |

**Table S7.**

Comparison of prediction results of different methods on S51.

| Methods             | ACC           | Sn            | Sp            | MCC           |
|---------------------|---------------|---------------|---------------|---------------|
| pRNAm-PC            | 69.74%        | 69.72%        | 69.75%        | 0.4000        |
| M6AMRFS             | 74.25%        | 75.21%        | 73.30%        | 0.4852        |
| iN6-Methyl (5-step) | 75.38%        | 76.15%        | 74.62%        | 0.5078        |
| <b>DNN-m6A</b>      | <b>78.50%</b> | <b>78.66%</b> | <b>78.34%</b> | <b>0.5707</b> |
